# Supplementary material
Source: publisher figshare collection journal article supplement (https://frontiersin.figshare.com/ndownloader/files/26140259)
Supplement: Supplementary file [file 26140259]

**Supplemental Figure 3.** Relation between BBB (quantitative assessment) and HT in MR studies. BBB, blood–brain barrier; HT, hemorrhagic transformation; MR, magnetic resonance.

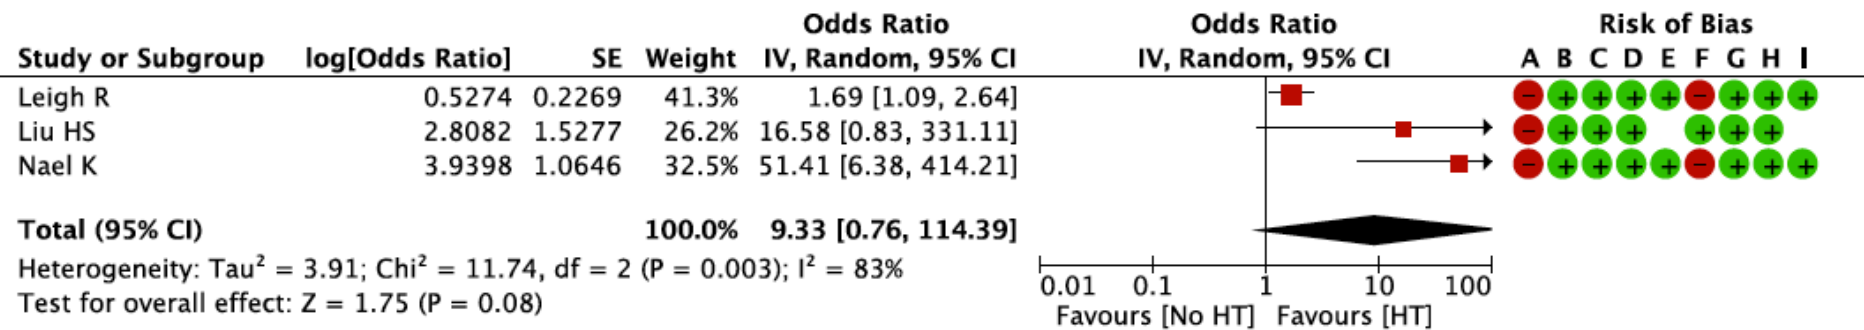

Risk of bias legend

- (A) Representativeness
- (B) Selection of non-exposed cohort
- (C) Ascertainment of exposure
- (D) Outcome of interest was not present at the study entry
- (E) Comparability
- (F) Outcome assessment
- (G) Length of follow-up
- (H) Adequacy of follow-up
- (I) Overall
